# Supplementary material for: Usnea aurantiaco-atra (Jacq) Bory: Metabolites and Biological Activities
Source: MDPI journal article supplement (doi:10.3390/molecules28217317), 2023-10-28

***Usnea aurantiaco-atra*(Jacq) Bory: metabolites and biological activities**

**Journal name: Molecules**

**María Jesús Vega-Bello, Mari Luz Moreno, Rossana Estellés-Leal, José Miguel Hernández-Andreu\*, Jesús A Prieto-Ruiz**

**\*Correspondence**

José Miguel Hernández Andreu

Department of Basic Biomedical Sciences. Catholic University of Valencia “San Vicente Mártir”, C/Quevedo 2, 46001 Valencia, Spain

Molecular and Mitochondrial Medicine Research Group, Catholic University of Valencia “San Vicente Mártir”, 46001 Valencia, Spain

E-mail: [jmiguel.hernandez@ucv.es](mailto:jmiguel.hernandez@ucv.es)

Figure S4. Chromatogram of F1 from the hexane extract

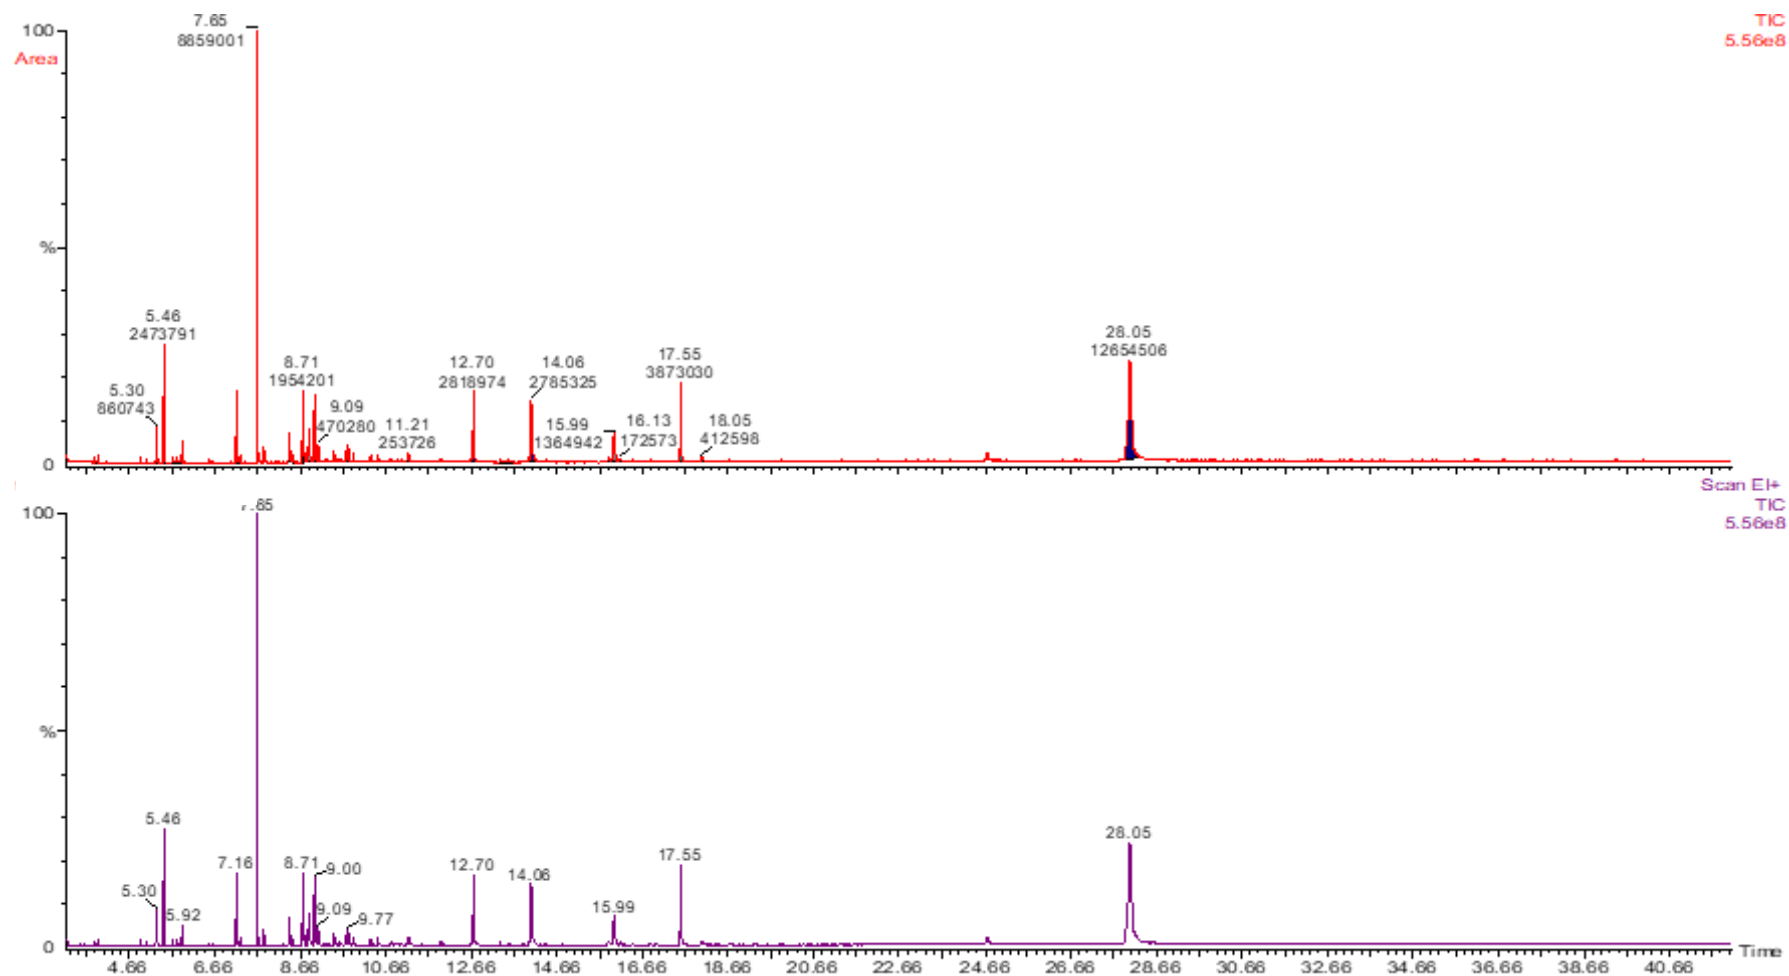

Supplement: s1 [file s1]
